# Supplementary material for: Facile synthesis of porous MnCo2O4.5 hierarchical architectures for high-rate supercapacitors
Source: Royal Society of Chemistry journal article supplement (doi:10.1039/c3ce42581a), 2014-01-01
Supplement: c3ce42581a.pdf [file c3ce42581a.pdf]

## Electronic Supplementary Information

### **Facile synthesis of porous MnCo<sub>2</sub>O<sub>4.5</sub> hierarchical architectures for high-rate supercapacitors**

Wenyao Li,<sup>ab</sup> Kaibing Xu,<sup>a</sup> Guosheng Song,<sup>a</sup> Xiying Zhou,<sup>b</sup> Rujia Zou,<sup>a\*</sup> Jianmao Yang,<sup>a</sup> Zhigang Chen<sup>a</sup> and Junqing Hu<sup>\*a</sup>

<sup>a</sup> State Key Laboratory for Modification of Chemical Fibers and Polymer Materials,  
College of Materials Science and Engineering, Donghua University, Shanghai 201620,  
China

<sup>b</sup> School of material engineering, Shanghai university of engineering science,  
Shanghai 201620, China

E-mail: [rjzou@dhu.edu.cn](mailto:rjzou@dhu.edu.cn); [hu.junqing@dhu.edu.cn](mailto:hu.junqing@dhu.edu.cn)

## Part I: Calculations

The specific capacitance of the electrode was calculated from the C-V curves according to the following equation:<sup>1</sup>

$$C = \frac{Q}{\Delta V * m}$$

where  $C$  ( $\text{F g}^{-1}$ ) is the specific capacitance,  $m$  (g) is the mass of the active materials in the electrodes,  $Q$  (C) is an average charge during the charging and discharging processes, and  $\Delta V$  (V) is the potential window.

The discharge specific capacitance is calculated from the discharge curves using the following formula:<sup>1</sup>

$$C = \frac{I * \Delta t}{m * \Delta V}$$

where  $I$  (A),  $\Delta t$  (s),  $m$  (g), and  $\Delta V$  (V) are the discharge current, discharge time consumed in the potential range of  $\Delta V$ , mass of the active materials, and the potential windows, respectively.

## Reference

- 1 J. Yan, E. Khoo, A. Sumboja, P. S. Lee, *ACS Nano* 2010, **4**, 4247.

## Part II: Supplementary Figures

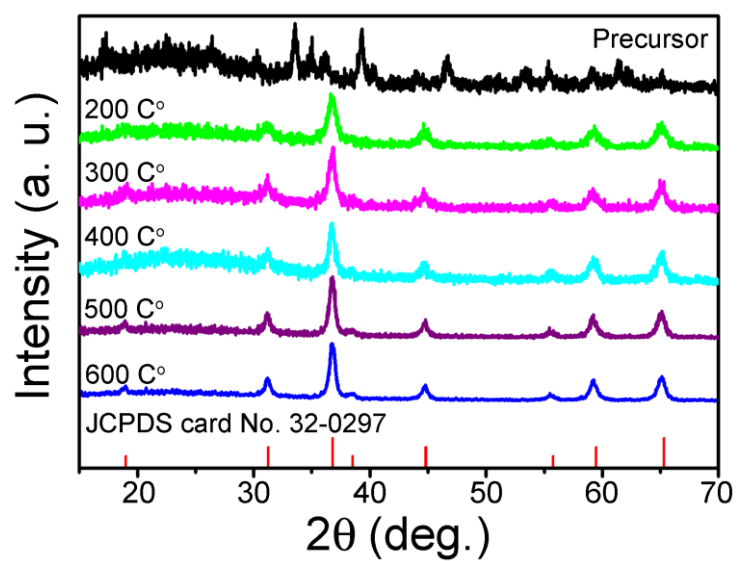

**Fig. S1** XRD of the precursor before and after the calcination in different temperatures.

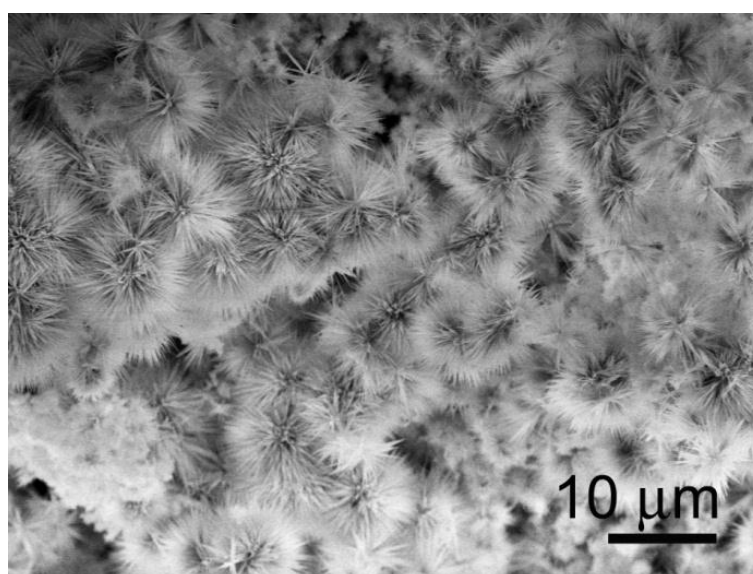

**Fig. S2** Low-magnification SEM image of the precursors.

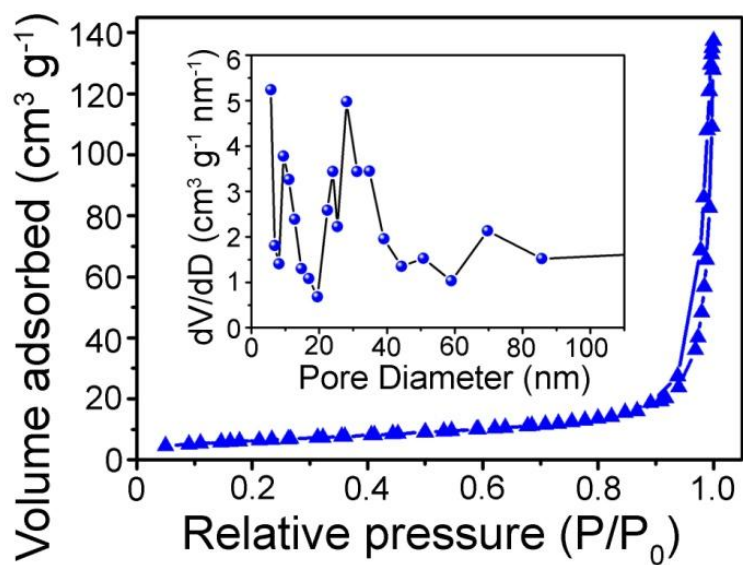

**Fig. S2**  $\text{N}_2$  adsorption-desorption isotherms of porous  $\text{MnCo}_2\text{O}_{4.5}$  hierarchical architectures and corresponding pore size distribution curves.

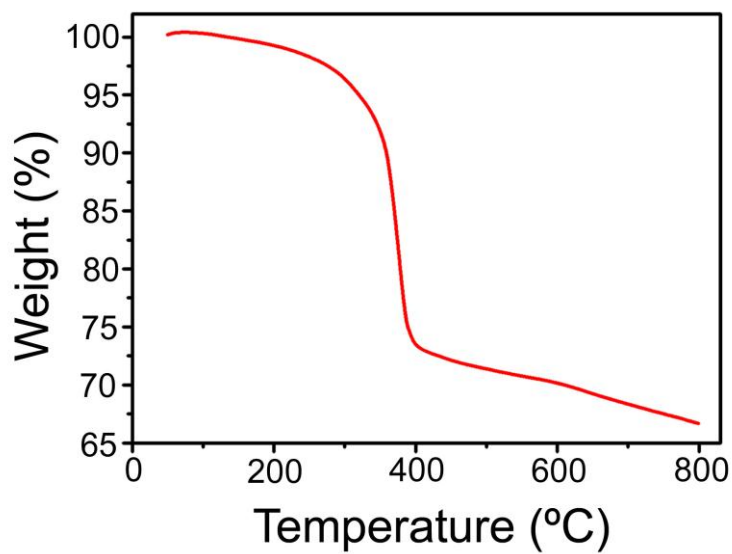

**Fig. S3** TGA curves for the as-prepared precursor in air.

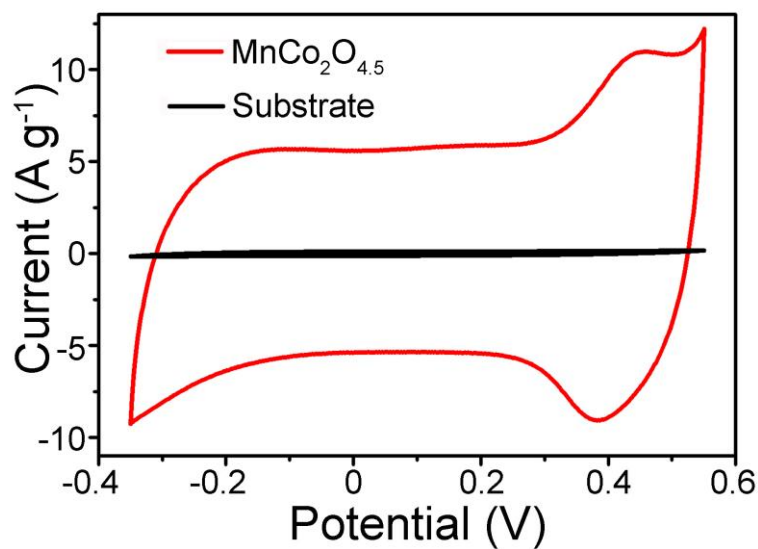

**Fig. S4** CV curves recorded from the substrate and 3D urchin-like MnCo<sub>2</sub>O<sub>4.5</sub> hierarchical architecture, respectively, at a scan rate of 50 mV s<sup>-1</sup>.

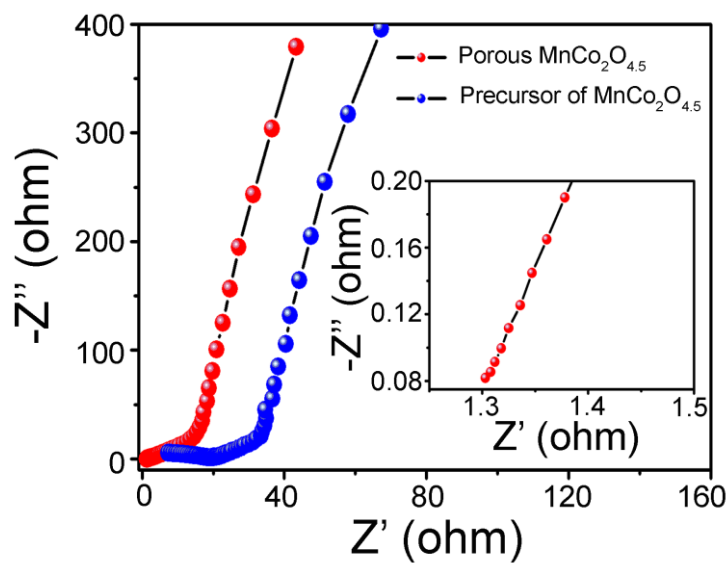

**Fig. S5** Nyquist plots of the 3D urchin-like MnCo<sub>2</sub>O<sub>4.5</sub> hierarchical architecture and the precursor.

**Table 1** The specific capacitance of MnCo<sub>2</sub>O<sub>4.5</sub> electrode under different scan rates

| Scan rate (mV/s)           | 10    | 20    | 40    | 50    | 60    | 80    | 100  |
|----------------------------|-------|-------|-------|-------|-------|-------|------|
| Specific capacitance (F/g) | 130.4 | 121.8 | 114.4 | 111.2 | 108.2 | 103.2 | 98.4 |
